# Supplementary material
Source: publisher figshare collection journal article supplement (https://acs.figshare.com/ndownloader/files/4990780)
Supplement: Supplementary file 1 [file 4990780]

# Supporting Information for

## Supramolecular Engineering of Hierarchically Self-assembled, Bioinspired, Cholesteric Nanocomposites formed by Cellulose Nanocrystals and Polymers

*Baolei Zhu, Remi Merindol, Alejandro J. Benitez, Baochun Wang, Andreas Walther\**

DWI – Leibniz-Institute for Interactive Materials, Forckenbeckstr. 50, 52056 Aachen,

E-mail: [walther@dwil.rwth-aachen.de](mailto:walther@dwil.rwth-aachen.de)

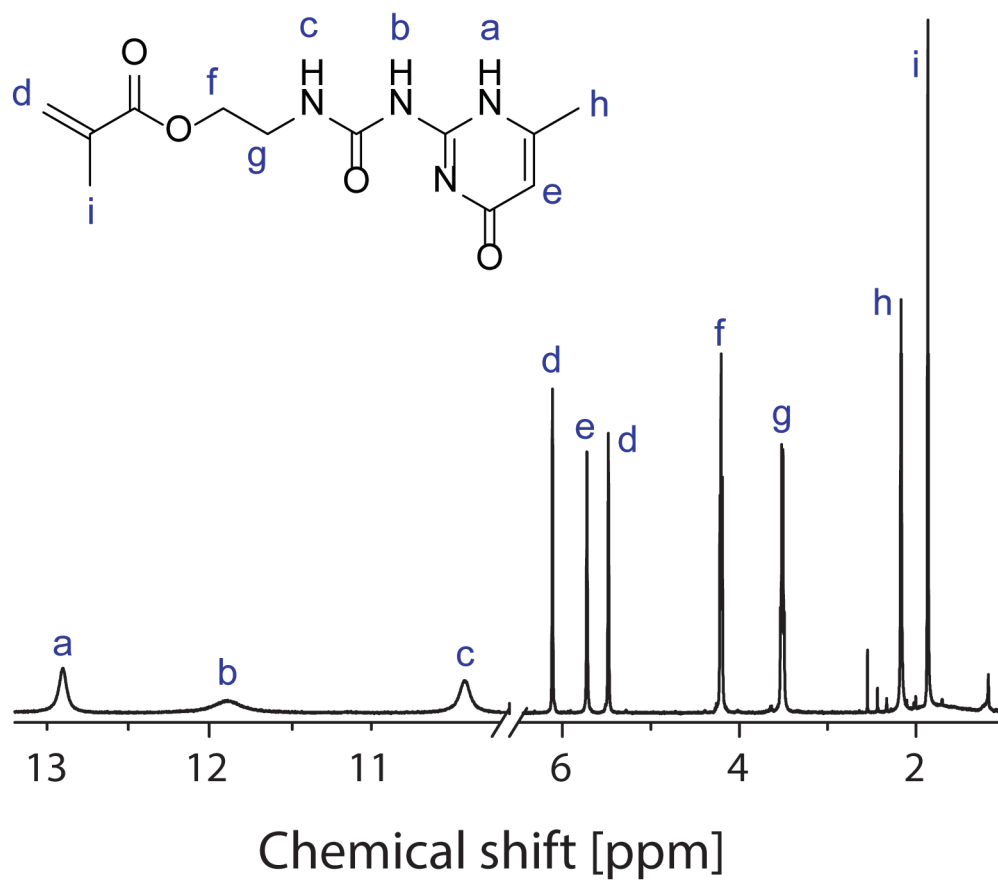

**Figure S1.** <sup>1</sup>H NMR spectra of UPy-MA. 1.89 (s, 3H, CH<sub>3</sub>), 2.14 (s, 3H, ArCH<sub>3</sub>), 3.50 (m, 2H, NHCH<sub>2</sub>), 4.19 (t, 2H, OCH<sub>2</sub>), 5.50 (m, 1H, C=CH<sub>2</sub>), 5.74 (s, 1H, aromatic ring), 6.10 (s, 1H, C=CH<sub>2</sub>), 10.42 (s, 1H, NH), 11.90 (s, 1H, NH), 12.90 (s, 1H, NH).

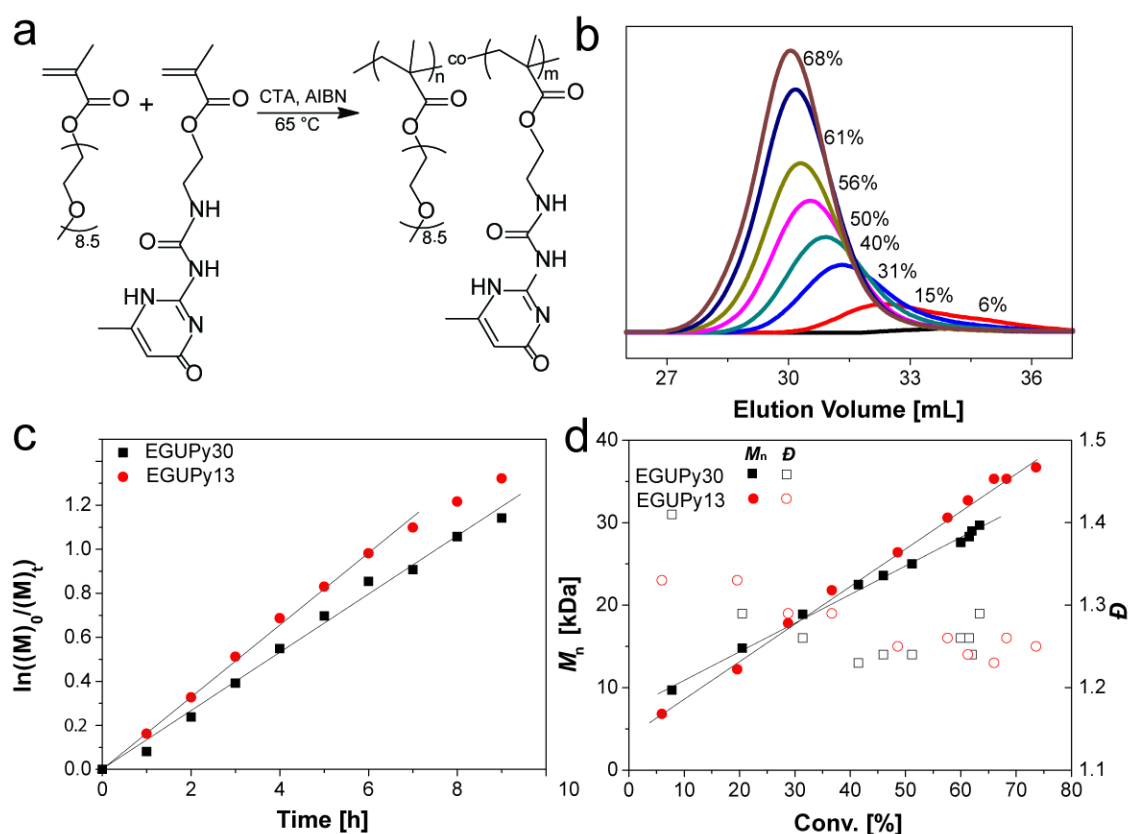

**Figure S2. RAFT polymerization kinetics of selected EGUPyX copolymerizations.** Representative RAFT polymerization kinetics for conditions: [Monomer] : [CTA] : [Initiator] = [200] : [1] : [0.2], whereby “monomer” is composed of OEGMA and UPy-MA in the respective molar fractions (13 and 30 mol% of UPy-MA). Note that higher molecular weights are accessible by changing the ratio of [monomer]/[CTA]. (a) Schematic RAFT polymerization. (b) GPC traces with conversion from RAFT copolymerization of 13 mol% of UPy-MA and 87 mol% of OEGMA, where a consistent shift of the elution traces towards lower elution volume can be observed with progressing polymerization time/conversion. (c) The figure depicts linear first order kinetic plots, which are indicative of a constant radical concentration and a controlled radical polymerization taking place. (d) Evolution of molecular weights and polydispersities. The number average molecular weights,  $M_n$ , increase linearly with conversion, while the polydispersities remain low (typically below 1.3).

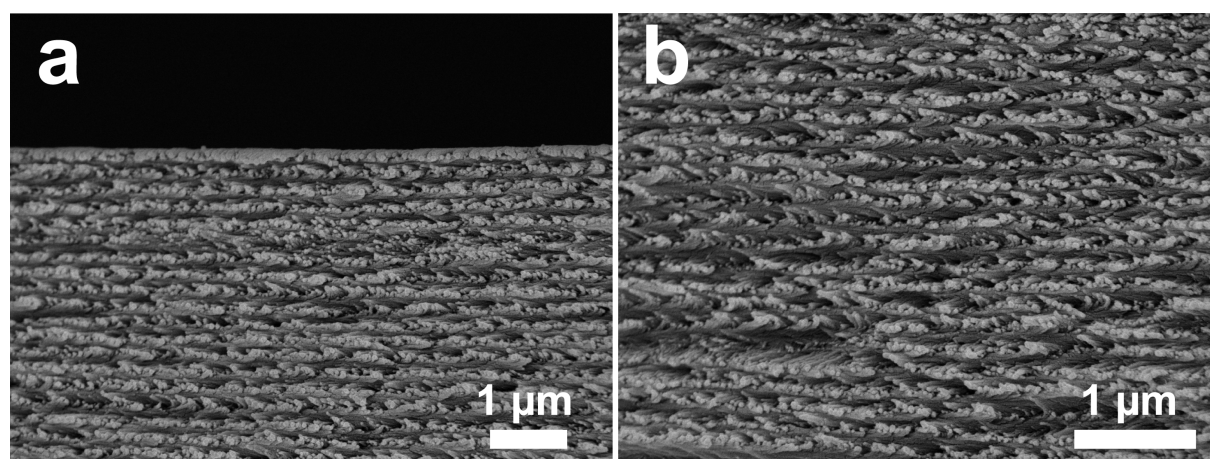

**Figure S3. Further SEM images of the cross sections of the photonic films with different polymer content showing the long range cholesteric order.** a) EGUPy13/CNC = 40/60, b) EGUPy13/CNC = 30/70.
